# Supplementary material for: Metabolic engineering Escherichia coli for high-level production of pseudouridine
Source: Research Square preprint supplement (doi:10.21203/rs.3.rs-3007742/v1), 2023-06-07
Supplement: Supplementary file 1 [file 6a7e7404d17fdbb222f54905.doc]

**Additional file to**

**Metabolic engineering of *Escherichia coli* for high-level production of pseudouridine**

*Microbial Cell Factories*

Min Zhou1*, Ruyu Tang1, Liyuan Wei1, Jidong Wang2, Huan Qi2

1Institute of Biopharmaceuticals, School of Pharmaceutical Sciences, Taizhou University, 1139 Shifu Avenue, Taizhou 318000, China

2Key Laboratory of Vector Biology and Pathogen Control of Zhejiang Province, College of Life Science, Huzhou University, Huzhou 313000, China

*Corresponding author: Min Zhou

E‑mail: zhoumin@tzc.edu.cn


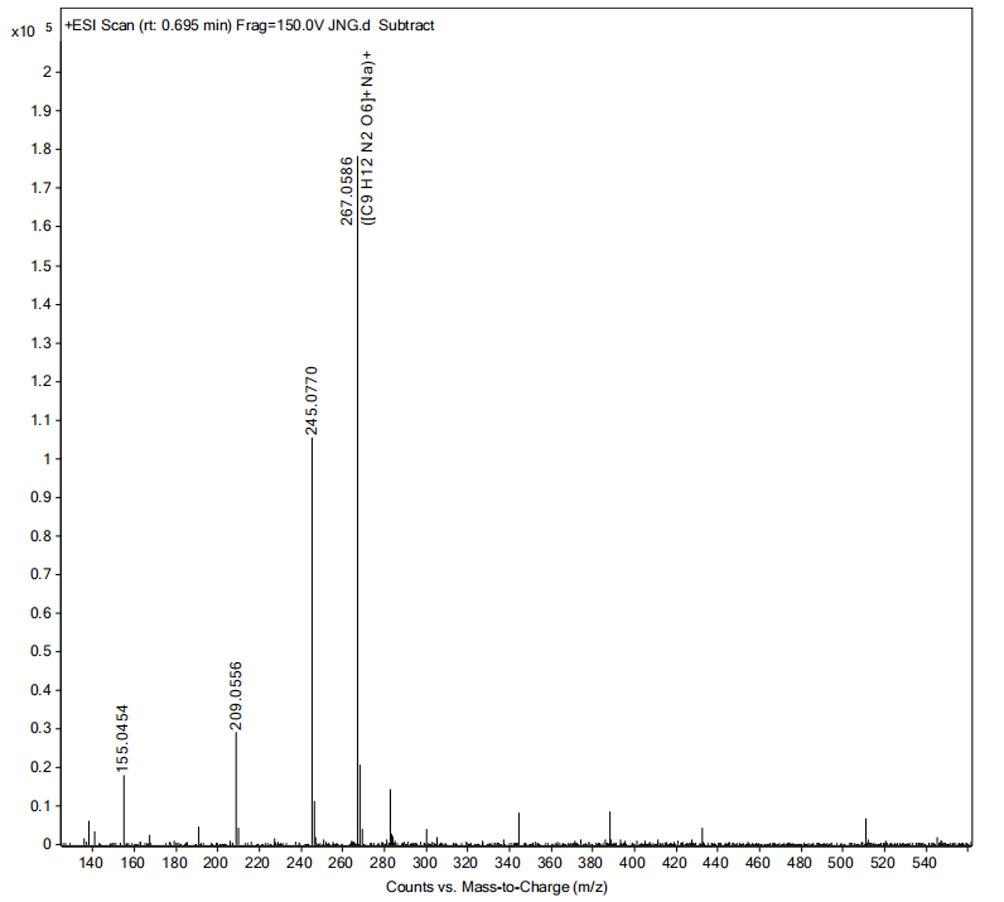


**Figure S1:** Mass spectrum of pseudouridine isolated from the fermentation broth of *E.coli*.

**
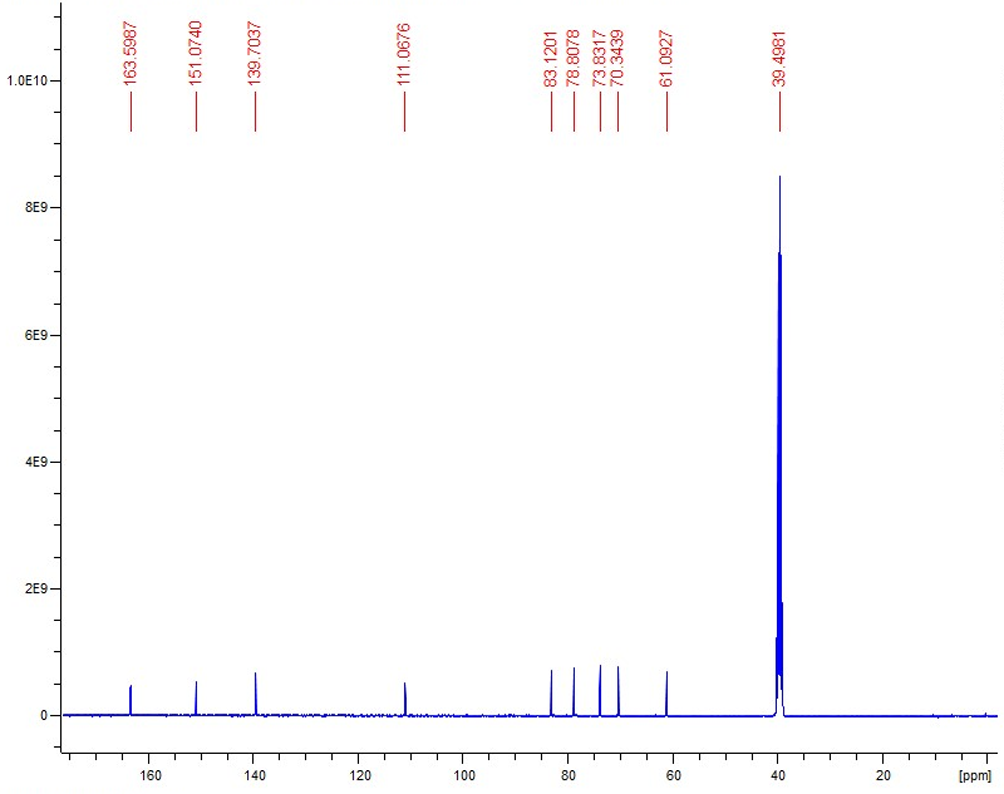
**

**Figure S2:** 13C NMR spectra of pseudouridine isolated from the fermentation broth of *E.coli*.

**
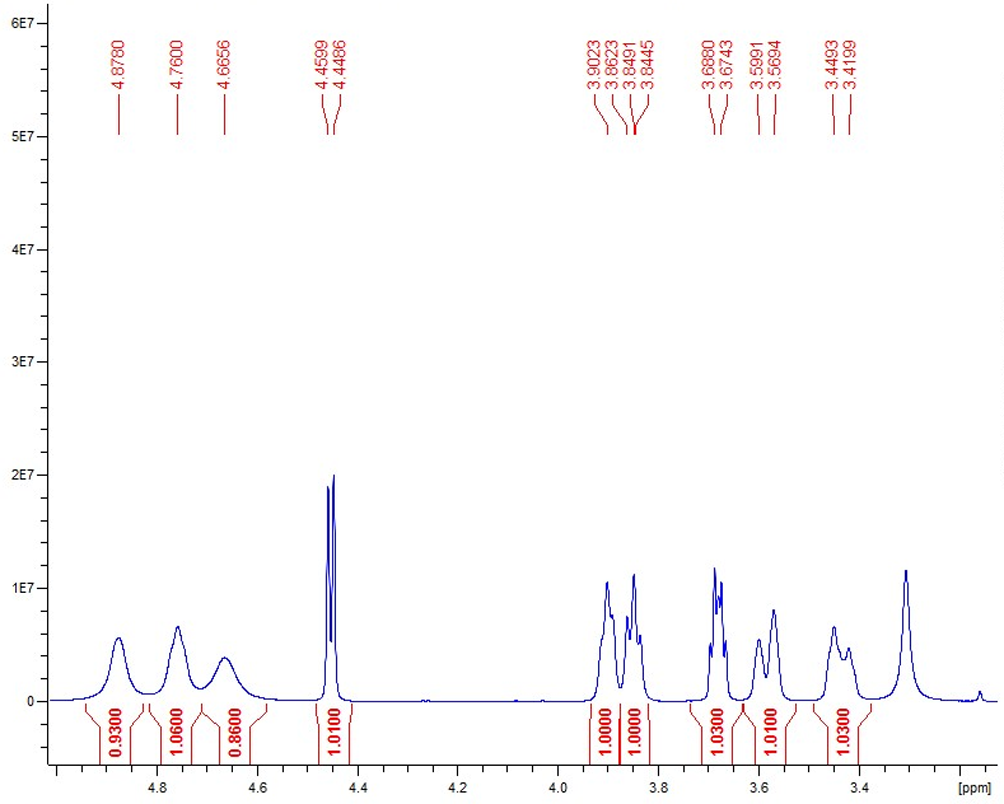
**

**Figure S3:** 1H NMR spectra of pseudouridine isolated from the fermentation broth of *E.coli*.

**Table S1**： Bacterial strains and plasmids used in this study.

| Strains/Plasmids | Description | References |
| --- | --- | --- |
| Strains |  |  |
| *E.coli* DH5α | Cloning host | Thermo Fisher |
| *E. coli* MG1655 | Wild-type, starting strain | This lab |
| MG1655(phoAEcpsuG) | MG1665 carrying pZH2 | This study |
| ZM1 | MG1665, Δ*thrA* | This study |
| ZM2 | MG1665, Δ*thrA*, Δ*argF* | This study |
| ZM3 | MG1665, Δ*thrA*, Δ*argF,* Δ*pepA* | This study |
| ZM3(phoAEcpsuG) | ZM3 carrying pZH2 | This study |
| ZM3(SDT1EcpsuG) | ZM3 carrying pZH3 | This study |
| ZM3(YKL033W-AEcpsuG) | ZM3 carrying pZH4 | This study |
| ZM3(PHM8EcpsuG) | ZM3 carrying pZH5 | This study |
| ZM3(pumDEcpsuG) | ZM3 carrying pZH6 | This study |
| ZM3(pumDKspsuG) | ZM3 carrying pZH7 | This study |
| ZM3(pumDRspsuG) | ZM3 carrying pZH8 | This study |
| ZM3(pumDSspsuG) | ZM3 carrying pZH9 | This study |
| ZM3(pumDSppsuG) | ZM3 carrying pZH10 | This study |
| ZM4 | ZM3, Δ*psuK* | This study |
| ZM5 | ZM3, Δ*psuK*, and Δ*psuT* | This study |
| ZM4(pumDRspsuG) | ZM4 carrying pZH8 | This study |
| ZM5(pumDRspsuG) | ZM5 carrying pZH8 | This study |
| ZM3(pZH20) | ZM3 carrying pZH20 | This study |
| ZM3(pZH21) | ZM3 carrying pZH21 | This study |
| ZM3(pZH14-22) | ZM3 carrying pZH14 and pZH22 | This study |
| ZM3(pZH23) | ZM3 carrying pZH23 | This study |
| BL21(phoA) | BL21(DE3) carrying pZH1 | This study |
| BL21(*SDT1*) | BL21(DE3) carrying pZH11 | This study |
| BL21(*YKL033W-A*) | BL21(DE3) carrying pZH12 | This study |
| BL21(*PHM8*) | BL21(DE3) carrying pZH13 | This study |
| BL21(*pumD*) | BL21(DE3) carrying pZH14 | This study |
| BL21(*EcpsuG*) | BL21(DE3) carrying pZH15 | This study |
| BL21(*KspsuG*) | BL21(DE3) carrying pZH16 | This study |
| BL21(*RspsuG*) | BL21(DE3) carrying pZH17 | This study |
| BL21(*SspsuG*) | BL21(DE3) carrying pZH18 | This study |
| BL21(*SppsuG*) | BL21(DE3) carrying pZH19 | This study |
| Plasmids |  |  |
| pET-30a (+) | Expression vector | Thermo Fisher |
| pZH1 | pET-30a (+) with *phoA* | This study |
| pZH2 | pET-30a (+) with *phoA* and *ECpsuG* | This study |
| pZH3 | pET-30a (+) with *SDT1* and *ECpsuG* | This study |
| pZH4 | pET-30a (+) with *YKL033W-A* and *ECpsuG* | This study |
| pZH5 | pET-30a (+) with *PHM8* and *ECpsuG* | This study |
| pZH6 | pET-30a (+) with *pumD* and *ECpsuG* | This study |
| pZH7 | pET-30a (+) with *pumD* and *KspsuG* | This study |
| pZH8 | pET-30a (+) with *pumD* and *RspsuG* | This study |
| pZH9 | pET-30a (+) with *pumD* and *SspsuG* | This study |
| pZH10 | pET-30a (+) with *pumD* and *SppsuG* | This study |
| pZH11 | pET-30a (+) with *SDT1* | This study |
| pZH12 | pET-30a (+) with *YKL033W-A* | This study |
| pZH13 | pET-30a (+) with *PHM8* | This study |
| pZH14 | pET-30a (+) with *pumD* | This study |
| pZH15 | pET-30a (+) with *EcpsuG* | This study |
| pZH16 | pET-30a (+) with *KspsuG* | This study |
| pZH17 | pET-30a (+) with *RspsuG* | This study |
| pZH18 | pET-30a (+) with *SspsuG* | This study |
| pZH19 | pET-30a (+) with *SppsuG* | This study |
| pZH20 | T7 promoter was replace with Trc in pZH8 | This study |
| pZH21 | pCDFDuet-1 with *pumD* and *RspsuG* | This study |
| pZH22 | pCDFDuet-1 with *RspsuG* | This study |
| pZH23 | pET-30a (+) with *RspsuG* and *pumD* | This study |

**Table S2:** Primers used for plasmid construction and gene knockout.

| **Primer** | **Sequence** |
| --- | --- |
| phoAF | AGAAGGAGATATACATATGAAACAAAGCACTATT |
| phoAR | TGATGATGATGATGGTGTTTTATTTCAGCCCCAGA |
| psuGF | GACAGCCCAGATCTGAAAGGAGGATATACATATGTCTGAATTAAAAATT |
| psuGR | GCTCGAATTCGGATCCTTAACCCGCGAGACGCTG |
| SDT1F | AGAAGGAGATATACATATGACTGTAGAATATACAG |
| SDT1R | TGATGATGATGATGGTTTAGAACAAGTCGCTAACA |
| YKL033W-AF | AGAAGGAGATATACATATGACACACCCCGTTGCT |
| YKL033W-AR | TGATGATGATGATGGTTTACAGGCCGTATTTCGACA |
| PHM8F | AGAAGGAGATATACATATGACAATTGCTAAAGAT |
| PHM8R | TGATGATGATGATGGTTTAGCTCGATTGGACGTT |
| pumDF | AGAAGGAGATATACATATGACTGGAACAGTTTTA |
| pumDR | TGATGATGATGATGGTTTAGGTCCATTGCGACAGT |
| KspsuGF | GACAGCCCAGATCTGAAAGGAGGATATACATATGAGTGAATTAAATATA |
| KspsuGR | GTGGTGGTGGTGGTGTTATCAGGCAATCTGTTG |
| RspsuGF | GACAGCCCAGATCTGAAAGGAGGATATACATATGACAAAACCATTTTCA |
| RspsuGR | GTGGTGGTGGTGGTGTTATTCACCCAGCGCCAC |
| SapsuGF | GACAGCCCAGATCTGAAAGGAGGATATACATATGCTAGTAGTTTCAGAA |
| SapsuGR | GTGGTGGTGGTGGTGTTACGCGCCTGCCCACGC |
| SppsuGF | GACAGCCCAGATCTGAAAGGAGGATATACATATGCACCAATTATTGAGG |
| SppsuGR | GTGGTGGTGGTGGTGTTAACGTCTGACACGTTT |
| **Primer** | **Sequence** |
| argF20F | GCGTTTAACGAGATGACGCGTTTTAGAGCTAGAAATAGC |
| argF20R | GCGTCATCTCGTTAAACGCACTAGTATTATACCTAGGAC |
| argF1 | GAAGTCGCTGTCGTTCTCA |
| argR1 | AAGCGTTGCCATCATCACAGCAGAGAAGTGAACTGT |
| argF2 | ACAGTTCACTTCTCTGCTGTGATGATGGCAACGCTT |
| argR2 | CTTGCCTTCAATCTTCTCG |
| argverF | CACGTAATCAGCAAGCGAT |
| argverR | CAGGCAATCAACACCTTG |
| thrAF20F | GGAACTGAAAGAAGGCTTACGTTTTAGAGCTAGAAATAGC |
| thrAF20R | GTAAGCCTTCTTTCAGTTCCACTAGTATTATACCTAGGAC |
| thrAF1 | GTACATCAGTGGCAAATGC |
| thrAR1 | AGATTAAGGCCATGTACATCAGCACCATGTGATCAG |
| thrAF2 | CTGATCACATGGTGCTGATGTACATGGCCTTAATCT |
| thrAR2 | CGAGCGAGAATCAATAGT |
| thrAverF | GTAACGAGGTAACAACCAT |
| thrAverR | GCACAGGTTCAATTTCAA |
| pepAF20F | GAGATGAAGTACGATATGTGGTTTTAGAGCTAGAAATAGC |
| pepAF20R | CACATATCGTACTTCATCTCACTAGTATTATACCTAGGAC |
| pepAF1 | CACGAAGTCATCGCAACA |
| pepAR1 | AGTTGTTCCTGATACTCGTGACGCACTTTCCAGTAG |
| pepAF2 | CTACTGGAAAGTGCGTCACGAGTATCAGGAACAACT |
| pepAR2 | CTTCACAGGCGATGAGCA |
| pepAverF | CAGATTTTGTTCTGACGT |
| pepAverR | GCTAAATTATGCGGAACAA |

**Table S3:** The sequences of codon optimized genes

| Gene | Gene sequence |
| --- | --- |
| *SDT1* | ATGACTGTAGAATATACAGCTTCAGATCTAGCTACGTACCAGAACGAGGTGAACGAGCAGATTGCGAAAAATAAAGCACACCTGGAGTCCCTGACCCATCCGGGTAGCAAAGTGACGTTTCCGATTGATCAAGACATCAGCGCAACCCCTCAAAACCCGAATCTGAAAGTCTTTTTCTTCGACATCGACAACTGCCTGTATAAGAGCTCGACCCGTATTCACGATCTGATGCAGCAGAGTATTCTGCGTTTTTTTCAAACTCACCTGAAGCTGTCCCCGGAAGATGCACATGTTCTGAATAACAGCTATTACAAGGAGTATGGTTTAGCGATCCGCGGTCTGGTGATGTTCCACAAAGTTAACGCTCTGGAATACAATCGTTTAGTGGATGACAGCCTGCCGCTGCAAGATATCCTGAAGCCGGATATTCCGCTGCGCAACATGCTGTTGCGCCTGCGTCAGTCCGGCAAGATCGACAAACTTTGGCTGTTCACCAATGCTTACAAGAACCATGCCATCCGTTGTTTGCGTCTGTTGGGCATCGCGGATCTCTTCGACGGCTTGACCTACTGCGATTATAGCAGAACAGATACCCTCGTCTGTAAACCGCACGTTAAAGCGTTTGAAAAAGCCATGAAGGAGTCTGGTCTTGCGCGTTATGAAAACGCGTACTTCATCGACGACAGCGGCAAGAACATTGAAACCGGTATTAAACTGGGCATGAAGACGTGCATTCACTTGGTAGAGAACGAGGTGAATGAGATCCTGGGTCAGACCCCGGAAGGTGCGATCGTTATTTCTGACATCTTGGAACTGCCACATGTTGTTAGCGACTTGTTCTAA |
| *YKL033W-A* | ATGACACACCCCGTTGCTGTAAAAGCATGTTTGTTTGACATGGATGGCCTCCTTATCAACACTGAGGACATCTACACCGAAACGCTGAACGAGACGCTCGCGGAATTCGGCAAGGGCCCACTGACCTGGGATGTGAAGATCAAACTGCAGGGTCTGCCGGGTCCGGAGGCTGGTAAGCGCGTGATTGAACATTATAAACTCCCTATCACCCTGGATGAGTATGATGAACGTAATGTTGCCCTACAATCCTTGAAGTGGGGCACCTGTGAATTCCTGCCGGGTGCGCTGAATCTGTTGAAGTACCTGAAGCTTAAGAACATTCCGATCGCGCTTTGCACCTCTAGCAACAAAACCAAATTCCGCGGTAAGACGTCCCATCTGGAGGAAGGTTTTGACCTGTTCGACACCATTGTGACCGGTGATGATCCGCGTATTGCCAAAGGCCGTGGCAAACCGTTTCCGGACATCTGGCAGCTGGGTTTAAAAGAACTGAACGAAAAGTTCCACACCGATATCAAGCCGGACGAGTGCATTGTTTTTGAAGACGGTATCCCGGGGGTGAAAAGCGCAAAAGCATTTGGTGCTCACGTCATTTGGGTTCCGCATCCGGAGGCGCACGCAGTTCTGGGCGACACTGAGGCGTTGTTGGCGGGTAAGGGCGAATTGCTGAGCAGCCTGGAGAAACTGGAGATGTCGAAATACGGCCTGTAA |
| *PHM8* | ATGACAATTGCTAAAGATTATAGGACTATATACCGTAATCAGATCAAGAAGCAGATCCGCCTGAATCAGGAGCACCTGCAGTCATTGACGCATCTGGGCTCGCAAATCAACTTTGAAGTTGATCCGCCTAAGCTTCCGGACCCGGACCCGGCACGTAAAGTGTTCTTCTTCGACATCGATAACACCCTGTATCGTAAAAGCACCAAAGTGCAGCTGCTGATGCAGCAATCCCTGAGCAACTTTTTTAAATATGAGTTGGGCTTTGACGACGATGAAGCGGAACGTTTAATTGAATCCTACTACCAGGAGTATGGTTTATCTGTTAAAGGTCTCATTAAAAACAAGCAAATCGACGACGTTCTGCAATATAACACGTTTATCGACGATAGCCTGCCGTTGCAAGATTATCTGAAGCCGGACTGGAAACTGCGTGAATTGCTGATCAACCTAAAGAAGAAGAAGTTGGGCAAATTCGACAAACTGTGGCTGTTCACCAATAGCTACAAAAATCATGCGATTCGCTGCGTCAAGATCCTTGGCATCGCCGATCTGTTCGATGGTATTACCTACTGCCACTATGATAGACCGATTGAGGAGGAGTTCATTTGTAAGCCGGATCCGAAGTTTTTCGAGACTGCGAAACTGCAGAGCGGTCTGAGTTCCTTCGCTAATGCGTGGTTTATTGACGACAACGAAAGCAACGTGCGTAGCGCACTGTCCATGGGCATGGGTCATGTGATTCACCTGATTGAGGATTACCAGTACGAGAGCGAAAATATTGTTACCAAAGACCACAAAAACAAACAGCAGTTTAGCATCCTGAAGGACATCTTAGAAATTCCGTTGATAATGGATGTTGAAGTGTACCGCCCAAGCTCTATCGCGATCAAGGAGATGGAAGAGCTGGAAGAGGAGGGTGAAGCTGTGAACTGGTCTAACCAACAAATCAACGTCCAATCGAGCTAA |
| *pumD* | ATGACTGGAACAGTTTTATTTGATCTATTCGGCGTTATCGCCCGTCACCAGAGCACCGAGGGTAAAAACCGTTTGACGCGTACTGCCGGCGTCGCCGGTCCGGCATTCTGGGATGCGTACTGGGAATTGCGCCCTCCGTATGATCGCGGTGAAGTTAATGGCCCAGGTTATTGGCGTCAAGTTGCCGACGCAATTGGCGTCCGTTTTGATGATCATCGTATCGCAGACCTGGTGGAAGCGGACATCGCTTCTTGGAGCGCGGTTGACGACACCATGGTTGCGCTGATTGAAGAGTTGACGGCGACCGGTCGTCACATGGGCCTGCTGAGCAACATTCCGGAGGAGCTTGCTTCCCATTACGAGGCGCATCACGCGTGGCTGAAGCACTTTCCGGTGCGTGCGTTCAGCTGCCGTATGGGCCACGCTAAACCGGAACGTGCTGCGTACGAGTGGTGTCAGCATGCGCTGCGTACCGAACCGGATCGCATCCTGTTCGTGGATGACCGGGCTGACAACGTGAGAGCGGCGGAAGAGTTAGGTATGCAGGGTCACCTGTTTACCACCCCGGATCGCCTCCGCCAAGCACTGTCGCAATGGACCTAA |
| *KspsuG* | ATGAGTGAATTAAATATATCTTCAGAGCTACTTCAGGTTTCAGCGGAGGTGCAGCAAGCGTTGAAGAACAACCAGCCGGTCGTTGCACTGGAGAGCACCATTATCTCCCACGGCATGCCATTTCCGGAAAATGCACAGACCGCGCTGGAAGTTGAAGAGACGATTCGTCGTCAGGGTGCGGTGCCGGCGACTATTGCGATCATCCATGGCGTGATGAAAGTCGGTCTGAGCAGAGAGGAGATCGAATTACTGGGTCGTGAGGGTCACAACGTGACGAAAGTGTCTCGCCGCGATCTCCCTTTCGTGGTCGCCGCAGGCTTGAACGGTGCGACGACAGTTGCGAGCACCATGATTATCGCGGCTATGGCTGGCATCAAGGTGTTTGCTACGGGTGGCATCGGCGGCGTTCATCGTGGTGCTGAGCACACCTTCGATATTTCTGCGGATTTGCAAGAGTTGGCGAACACCAATGTTACCGTGGTCTGTGCAGGCGCGAAATCGATCCTGGATCTGGGCCTGACCACCGAATACCTGGAAACCTTCGGCGTTCCGCTGATCGGCTACCAGACCTCCGCTTTGCCGGCGTTTTTCTGCCGTACCAGCCCGTTCGACGTAAGCATCCGCCTGAATAGCGCGAAGGACATTGCTAAGGCAATGGCGGTTAAATGGCAGTCCGGTCTAAAGGGTGGTATGGTTGTGGCTAATCCGATTCCGGAACAATTTGCCATGCCGGAAGCAAAGATTAACAGCGCGATCGACCAAGCGGTGCGTGAGGCGGAAGAGCAAGGTGTGGTGGGTAAAGAGTCTACTCCGTTCCTGCTGGCGCGTGTTGCCGAATTAACCGGTGGCGACAGCCTGAAAAGTAATATTCAGCTGGTTTTTAACAACGCCATCCTGGCCTGCGAGATCGCCAAAGAATATCAACAGATTGCCTAA |
| *RspsuG* | ATGACAAAACCATTTTCACCCCTATTACCTATTAGCTACAGCAAAGAAGTAGCTGCTGCGAAGCAACGTGGCGCACCGATTGTGGCCCTGGAGTCTACCATCATTACCCACGGCATGCCGTACCCGGGTAATATTGAGATGGCACGTTCCGTAGAATCGATCATCCGCGACCAGGGTGCGGTGCCGGCGACGATTGCGGTGATCCACGGCACCCTGCATATTGGGCTGGAACCGGCGGAGTTGGAGCAACTGGCTAAGGCGAAGGATGTTATGAAGGTGAGCCGTGCGGACATCGCGTTCAGCATCGCCGAGCGCCGTACCGGCGCGACGACCGTTGCGGCTACGATGATTGCGGCAGCGAGGGCTGGTATTAAAGTTTTTGCAACTGGTGGCATTGGCGGTGTTCATCGTGGTGCGGAGGAAACCTTCGACATCTCTGCGGACCTGGAAGAGCTCGCTCGCACCGGCGTCATCGTGGTCTGCGCAGGTGCGAAGGCAATCCTGGATATCCCGAAAACCTTGGAAGTGCTGGAAACTCGTGGTGTCCCTGTTGTTACCTATGAATCCGATGAATTTCCGGCCTTCTGGAGCCGTAGCAGCGGTATCAGATCCCCGCTGACGTTGAATTCGCCGGCGGCGATTGCTAACTTTCAGACCACCCGTGAACAATTGGGCATTGATGGCGGTATGTTAATTGCGAACCCGGTTCCAGAAGCTGACGAGATCGCCCGTGAGGAGATGGAAATCTATATCGAGCGCGCATTAGACAGCGCAGAGCGCGACGAGATCACCGGTAAAGCCGTGACTCCGTACCTGCTGTCTACCATCTTCGATCTCACAGATGGCCAGAGCCTGAAAACCAATATAGCGTTGGTTGAGAACAACGCACGTCTGGCCGCGGAGATCGCGGTGGCGCTGGGTGAATAA |
| *SspsuG* | ATGAGTCTACCCGTAGTTTCAGGAGAAGTCAGACGTGCTGTGGCCGAAGGTAGACCGGTTGTAGCGTTGGAGAGCACCATCATCACCCACGGCCTGCCACGTCCGGATAACGGTGAAGTTGCTCGCGCGGCTGAGCAACAGGTTCGTGCAGCCGGTGCCGTGCCTGCTACTATCGGCGTGATTGATGGTGTTGCGACGGTGGGTTTGACCGGCGCGCAGTTGGACCGTCTGGCGGGGGATCGCGCAGCGGTTAAGGCTTCCGTGCGTGACCTGCCGATTGCGGCTGCTAAAGGTCGCAACGCAGGCACCACTGTCGCTGCGACGAGCTTCCTGGCACATCGTGCGGGCATTCGTGTTTTTGCCACGGGCGGTTTGGGTGGCGTGCACCACGGCGCAGCCACCTCGTTCGACGAGTCTGCCGACCTGGTCACCCTCGCGGCAACTCCGCTGGTCGTTGTCAGCGCGGGCGTGAAAAGCATCCTGGATGTTGCGGCGACCCTGGAACGTCTGGAGACATTGAATATCCCGGTTCTGGGTTACCGCACCTTGCGCTTCCCGGGTTTTTACGTAGCGGATAGCGGCCATGCAATTGAACATAGCGTTGGTGCTCCGGCGGAGGTGGCGGCGGTGGTGACCGCGCGTGATGAGCTGGGCTTACGTTCTGCAGTTCTGGTGGCTAATCCGGTGCCGGCGGCGGAGCAACTGGACCCGACCCTGCACGATCGTGCTTTAGCGGAGGCATGGGAACAGGCACGCGAACAAGGTGTGTCCGGTCACGACATCACCCCGTTTCTGCTGGACCGCATCCGTACCGCAACCGGTGGCCGGTCCCTGGCCGTTAATATTGCAGTTTATCGTAACAACATCGCCCTAGCGACGGAAATTGCCACCGCGCTTGCGGGTTAA |
| *SppsuG* | ATGCACCAATTATTGAGGCTATCAGATGAAGTGGAACAAGCGTTGGAGGAAGGTCTGCCAGTGGTAGCACTTGAAACAACCGCGATCAACCACGGTCCGCCTTACCCGGGTAACCTGGAGTGGGCTCTGGCTATCTGCCGTGCTGTACGCGAAGGTGGCGCGTCTCCGGCACTGACCGGTATCGCCGACGGTCACTTTGTTGTTGGCATGAGCGAGAGCGATCTCGAGCGTTTTGCGGCGACGGCGCATATCCCGAAAGCATCCACCCGTGACCTGGGCCTGGTTTTGGCTTCTGGTGGTCTCGGCGCGACGACCGTTGCTTCCAGCCTGCTGATTGCACACCTGGCAGGCATCCCGGTGCTGAGCGCGGGGGGCATTGGCGGCGTTCACCGTAATGCATCGGCGACGTTCGATGTGTCCGCGGATTTAATGGAATTGACCCGTCATCAGGTCGCGGTGGTCTGCGCGGGAGCCAAGAGCATTCTGGATGTTGGTCTGACCCTGGAATACCTGGAGACTCTGGGTGTGCCGGTGATCGGTTATCGCTGCGCTGACTTCCCGGCATATCATTGTACCAGCTCTGGTTTTCCCAACCCGCAGCGTGTTGATGAATTGACTGCGCTGGCGGCTGCGGTTGACTTACATTGGACCGCGGGTGCTACGGGTTCAGTCGTGGTTACCAGCCCGATTGGCGCGGAGCACGCCCTGGACGGCGATCGTATTGAACAAGCGGTGCAGGGTGCGGTTCGTCAAGCTGGCCGCGACGGCGTGCACGGCGCGGCCATTACCCCGTACTTGTTGGAGGCAGTGTCCGCCGCCACAGGCGGTCGTAGCGCGGCGGCAAGCCGCAGCGTTCTGATCAGCACCGCGAAGCTGGCTGGTCAGGTGGCGGGCGCGTTCGCAGACCGTCAAACCGCCGAGCGCGGTGCGGGTCGCGCGCCGCGTCCGGGTCGCCAGGCTGGCAGAGCCGACGATGTTTGGAAACGTGTCAGACGTTAA |
